# Supplementary material for: Low temperature synthesis of ZrS2 nanoflakes and their catalytic activity
Source: Royal Society of Chemistry journal article supplement (doi:10.1039/c5ra12412c), 2015-01-01
Supplement: c5ra12412c1.pdf [file c5ra12412c1.pdf]

## Supporting Information (SI):

### Low Temperature Synthesis of ZrS<sub>2</sub> Nanoflakes and Their Catalytic Activity

Yan Wen, Yanqiu Zhu and Shaowei Zhang<sup>a</sup>

College of Engineering, Mathematics and Physical Sciences

University of Exeter, Exeter, EX4 4QF. E-mail: [s.zhang@exeter.ac.uk](mailto:s.zhang@exeter.ac.uk).

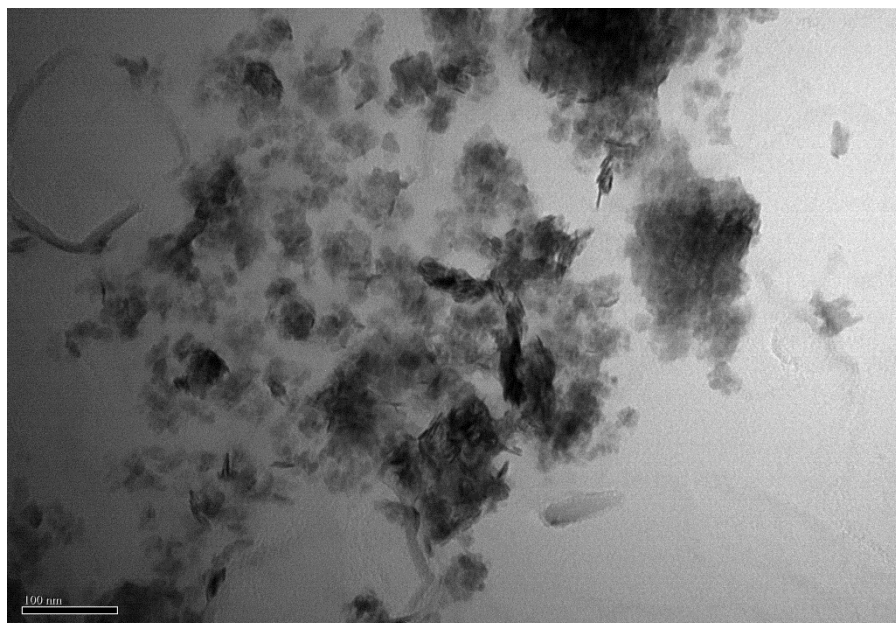

Figure S1 TEM image of sample resultant from 1-h firing at 700°C

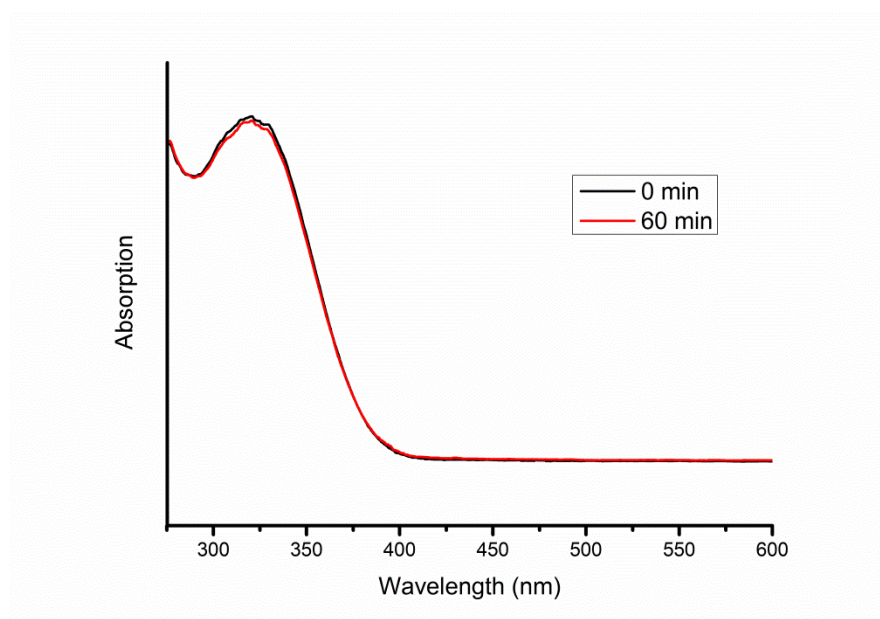

Figure S2 UV-vis absorption spectra of original 4-NP/H<sub>2</sub>O<sub>2</sub> solution and solution after 1h photocatalytic degradation
